# Supplementary material
Source: ML conference proceedings conference paper supplement (https://aclanthology.org/S19-2171)
Supplement: Supplementary [file S19-2171.Supplementary.pdf]

| #  | Features                                                                                                                                                                                                                                                                                                                                                        |
|----|-----------------------------------------------------------------------------------------------------------------------------------------------------------------------------------------------------------------------------------------------------------------------------------------------------------------------------------------------------------------|
|    | Basic count features                                                                                                                                                                                                                                                                                                                                            |
| 10 | Character count      Word count<br>Punctuation count      Special character count<br>Captial ratio      Functional word count<br>Average word length<br>Average syllable per word<br>Average sentence lenght by character<br>Average sentence lenght by word                                                                                                    |
|    | External links bias                                                                                                                                                                                                                                                                                                                                             |
| 3  | HP Link count<br>NonHP Link count<br>Unknown Link count                                                                                                                                                                                                                                                                                                         |
|    | Sentiment features                                                                                                                                                                                                                                                                                                                                              |
| 8  | Title compound      Title negative<br>Title neural      Title positive<br>Body compound      Body negative<br>Body neural      Body positive                                                                                                                                                                                                                    |
|    | Vocabulary richness & readability features                                                                                                                                                                                                                                                                                                                      |
| 14 | Brunet's W      Dis Legomenon<br>Hapax Legomenon      Honore's measure R<br>Shannon Entropy      Sicel's measure<br>Simpson's Index      Type token ratio<br>ARI      Dale-Chall Readability<br>Flesch Reading Ease      Flesch-Kinacaid Grade<br>Gunning Fog Index      Yule's characteristic K                                                                |
|    | Term features                                                                                                                                                                                                                                                                                                                                                   |
| 44 | ACCUSE ADMIT ADVISE ANSWER ASK1<br>ASK2 ARGUE ASSERT ATTACK BAPTIZE<br>BLAME CALL COMPLAIN CONCLUDE<br>CONFIRM DECLARE DISCUSS EXCLAIM<br>FORBID FORGIVE GUESS HINT INFORM<br>MOCK NEGATION OFFER ORDER PERMIT<br>PRAISE PROMISE REMARK REPROVE<br>RUMOUR STRESS SUMUP TALK TELL<br>SWEAR THANK WARN UNCONFIRMED<br>FALSE_ANTONYMS, FALSE_SYNONYMS,<br>WH_COUNT |
|    | Grammar transformation features                                                                                                                                                                                                                                                                                                                                 |
| 45 | ROOT, acl, acomp, advcl, advmod, agent,<br>amod, appos, attr, aux, auxpass, case, cc,<br>ccomp, compound, conj, csubj, csubjpass, dep,<br>dative, det, dobj, expl, intj, mark, meta, neg,<br>nmod, npadvmod, nsubj, nsubjpass, nummod,<br>oprd, parataxis, pcomp, pobj, poss, preconj,<br>predet, prep, prt, punct, quantmod, relcl, xcomp                      |
